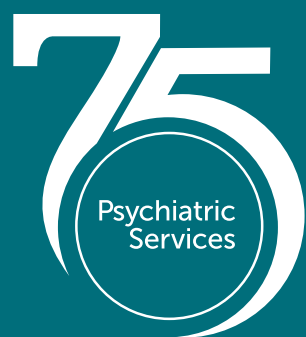

# Psychiatric Services

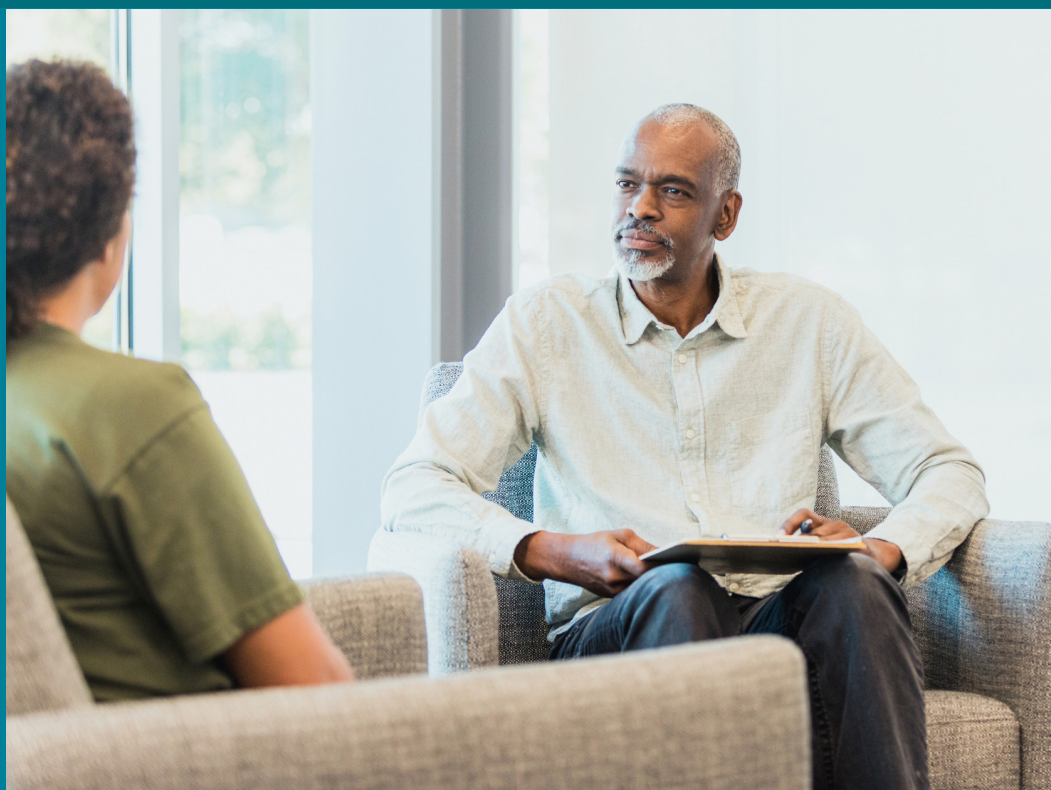

Role of institutional support in satisfaction and burnout among VA therapists

Viewpoint: The value equation in psychiatry

Remodeling systems: the national emergency in children's mental health

Microcosting analysis of coordinated specialty care for first-episode psychosis
